# Supplementary material
Source: PubMed Central journal article supplement (PMC149945)
Supplement: pnas_0436218100_4.pdf [file pnas_0436218100_4.pdf]

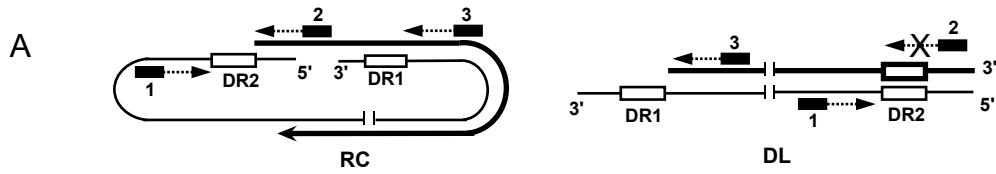

| Primer | Measurement on RC DNA                           | Measurement on DL DNA                              |
|--------|-------------------------------------------------|----------------------------------------------------|
| 1      | (-) DNA                                         | (-) DNA                                            |
| 2      | (+) DNA priming from DR2 (pre-circularization)  | no informative signal                              |
| 3      | (+) DNA priming from DR2 (post-circularization) | (+) DNA priming from DR1 ( <i>in situ</i> priming) |

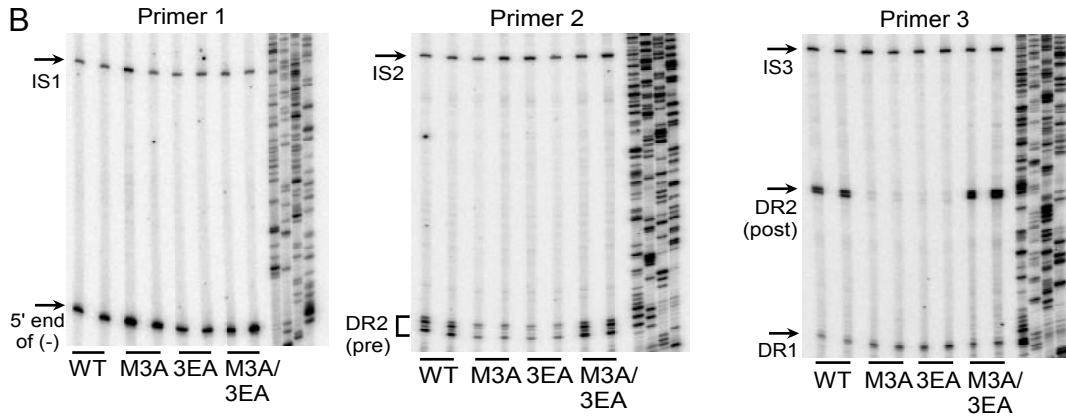

$$\text{primer translocation} = \frac{\text{DR2}(\text{primer 2})/\text{IS2}}{(-)\text{-strand}(\text{primer 1})/\text{IS1}}$$

$$\text{circularization} = \frac{\text{DR2}(\text{primer 3})/\text{IS3}}{\text{DR2}(\text{primer 2})/\text{IS2}}$$

$$\text{primer utilization} = \frac{\text{DR2}(\text{primer 2})/\text{IS2} + \text{DR1}(\text{primer 3})/\text{IS3}}{(-)\text{-strand}(\text{primer 1})/\text{IS1}}$$
