# Supplementary material
Source: PubMed Central journal article supplement (PMC149945)

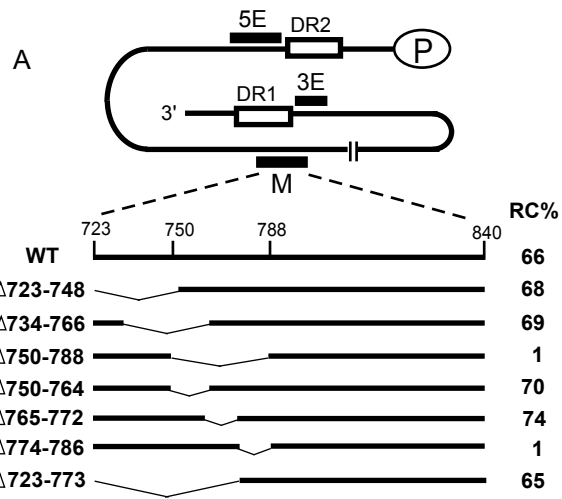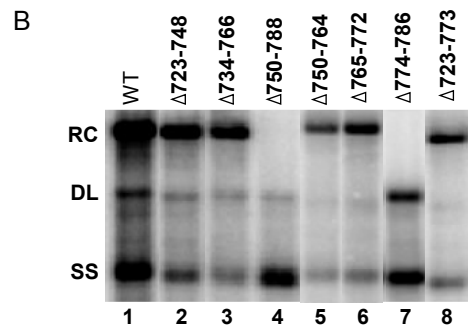

Supplement: pnas_0436218100_2.pdf [file pnas_0436218100_2.pdf]
